# Supplementary material for: Superhydrophobic Paper-Based Microfluidic Field-Effect Transistor Biosensor Functionalized with Semiconducting Single-Walled Carbon Nanotube and DNAzyme for Hypocalcemia Diagnosis
Source: MDPI journal article supplement (doi:10.3390/ijms23147799), 2022-07-15
Supplement: s1 [file s1]

# Superhydrophobic paper-based microfluidic field-effect transistor biosensor functionalized with semiconducting single-walled carbon nanotube and DNAzyme for hypocalcemia diagnosis

Hui Wang <sup>1</sup>, Ruipeng Chen <sup>1</sup>, Fan Zhang <sup>1,2</sup>, Zhixue Yu <sup>1</sup>, Yue Wang <sup>1</sup>, Zhonglin Tang <sup>1</sup>, Liang Yang <sup>1</sup>, Xiangfang Tang <sup>1\*</sup> and Benhai Xiong <sup>1\*</sup>

<sup>1</sup> State Key Laboratory of Animal Nutrition, Institute of Animal Science, Chinese Academy of Agricultural Sciences, Beijing 100193, China; wanghui10@caas.cn (H.W.); chen\_ruipeng@yeah.net (R.C.); zhangfan19@139.com (F.Z.); 82101205310@caas.cn (Z.Y.); wangyue9313@163.com (Y.W.); tangzhonglin@caas.cn (Z.T.); yangliang@caas.cn (L.Y.)

<sup>2</sup> State Key Laboratory of Animal Nutrition, College of Animal Science and Technology, China Agricultural University, Beijing 100193, China

\* Correspondence: tangxiangfang@caas.cn (X.T.); xiongbenhai@caas.cn (B.X.)

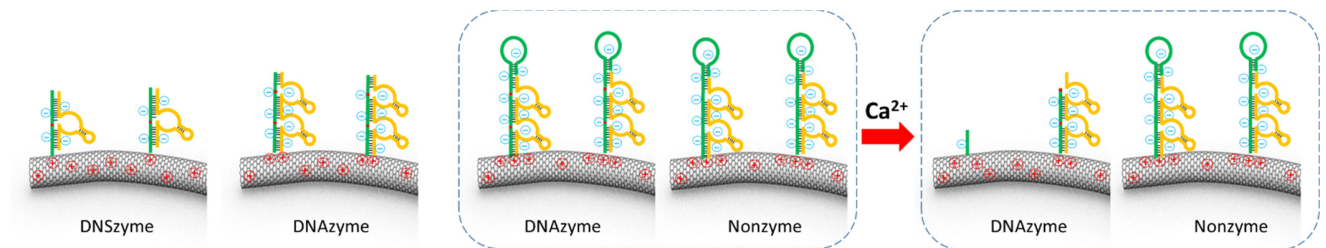

**Figure S1.** Mechanism of electrochemical field-effect biosensor for  $\text{Ca}^{2+}$  detection.

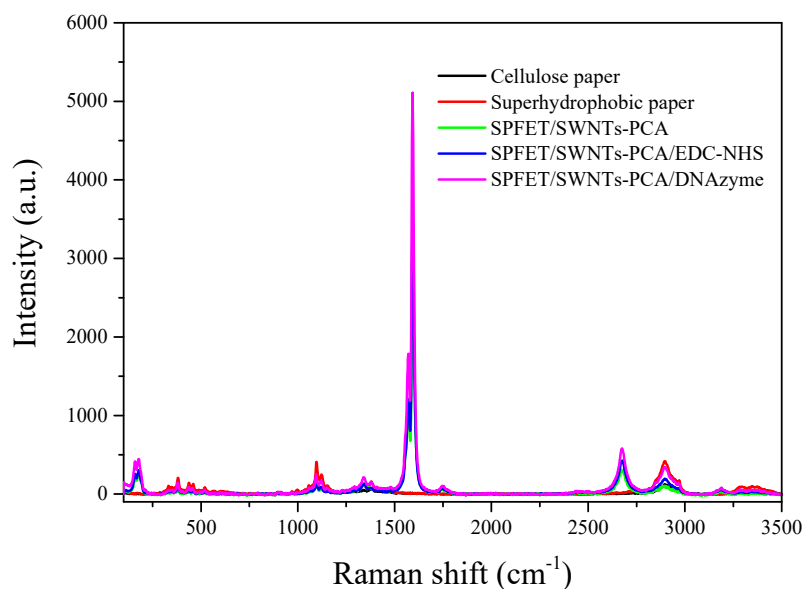

**Figure S2.** Raman spectra of cellulose paper before and after functionalized different materials: (a)Cellulose paper; (b)Superhydrophobic paper; (c)SPFET/SWNTs-PCA; (d)SPFET/SWNT-PCA/EDC-NHS and (e) SPFET/SWNT-PCA/DNAzyme.

**Table S1. The ratios of different bands to G-band**

|               | SWNT-PCA | EDC-NHS  | DNAzyme  |
|---------------|----------|----------|----------|
| $I_{RBM}/I_G$ | 0.0984   | 0.0805   | 0.0814   |
| $I_D/I_G$     | 0.0325   | 0.0286   | 0.0263   |
| $I_G/I_G$     | 0.109621 | 0.114043 | 0.105141 |

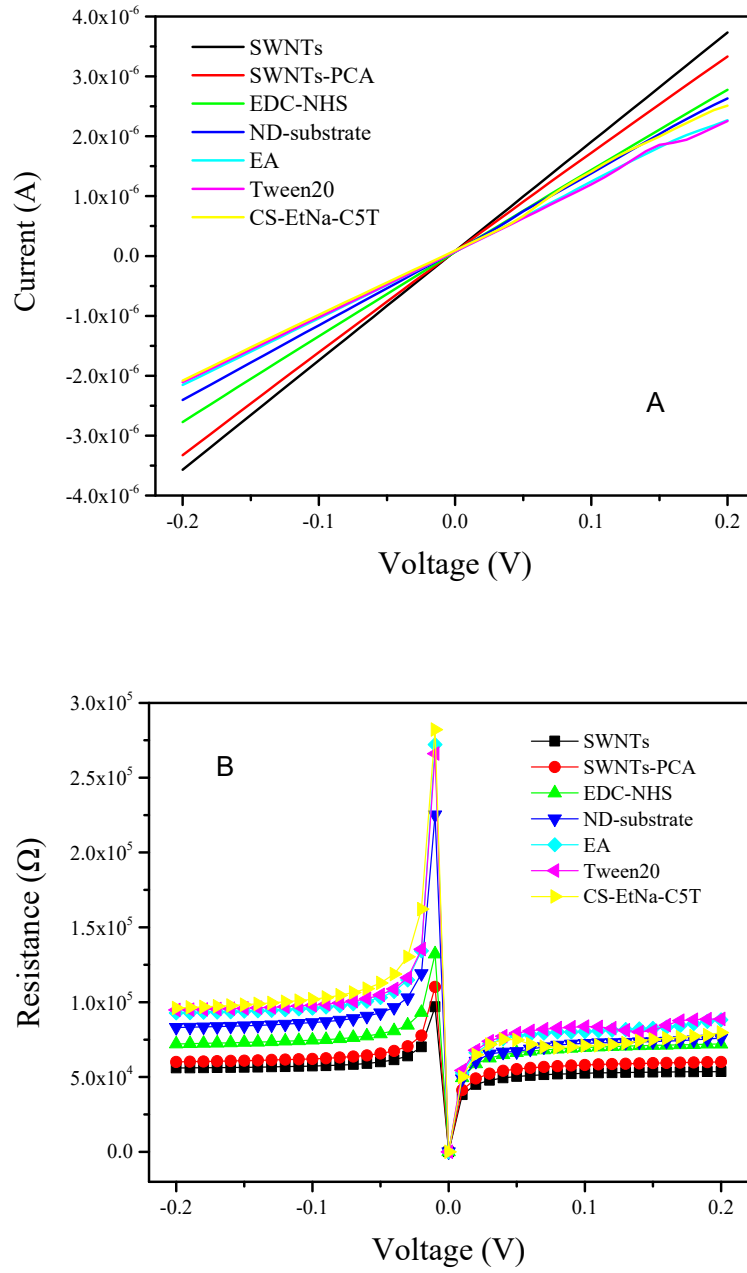

**Figure S3.** (A)  $I_{DS}$ - $V_{DS}$  and (B) Resistances of HPFET modified with different materials (SWNTs, PCA, EDC-NHS, ND-substrate, EA, Tween 20 and CS-EtNa-C5T) at different voltages.

## Optimization

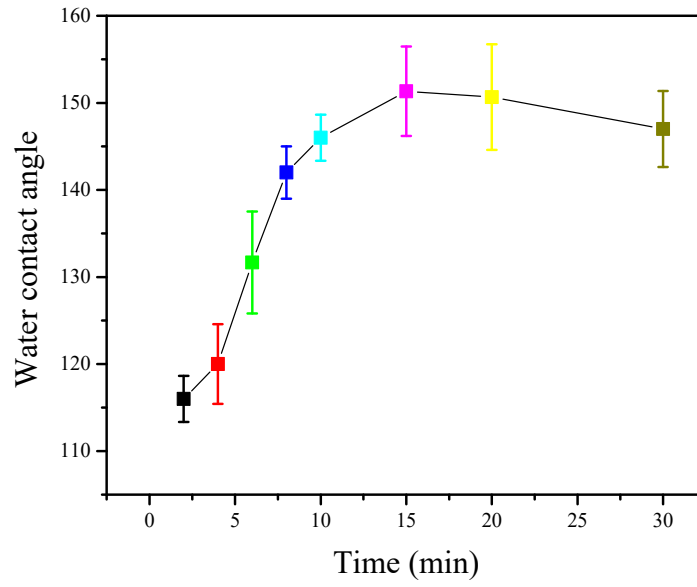

**Figure S4.** Water contact angle of cellulose paper changing with immersion time from 2 min to 30 min.

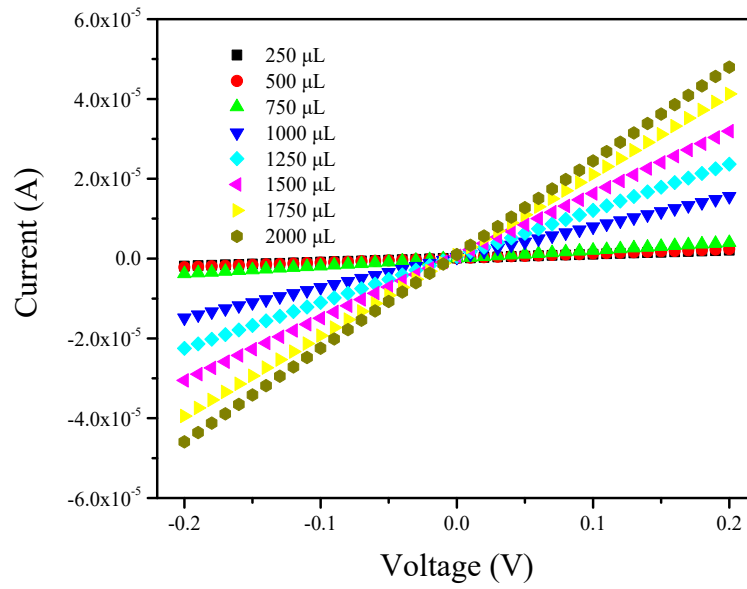

**Figure S5.** The  $I_{DS}$ – $V_{DS}$  of HPFET modified with different volume of SWNTs-PCA.

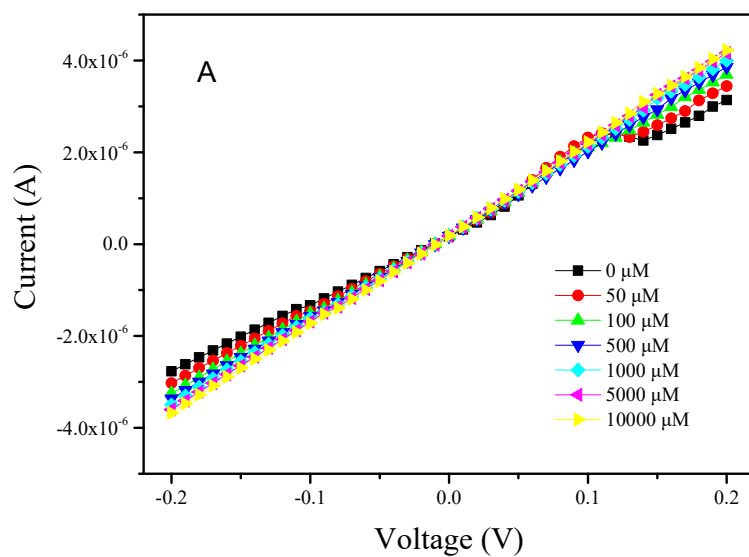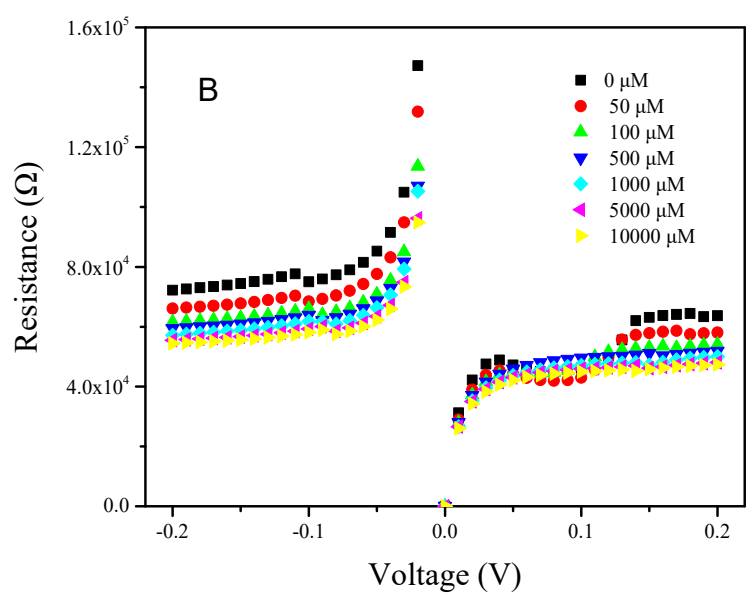

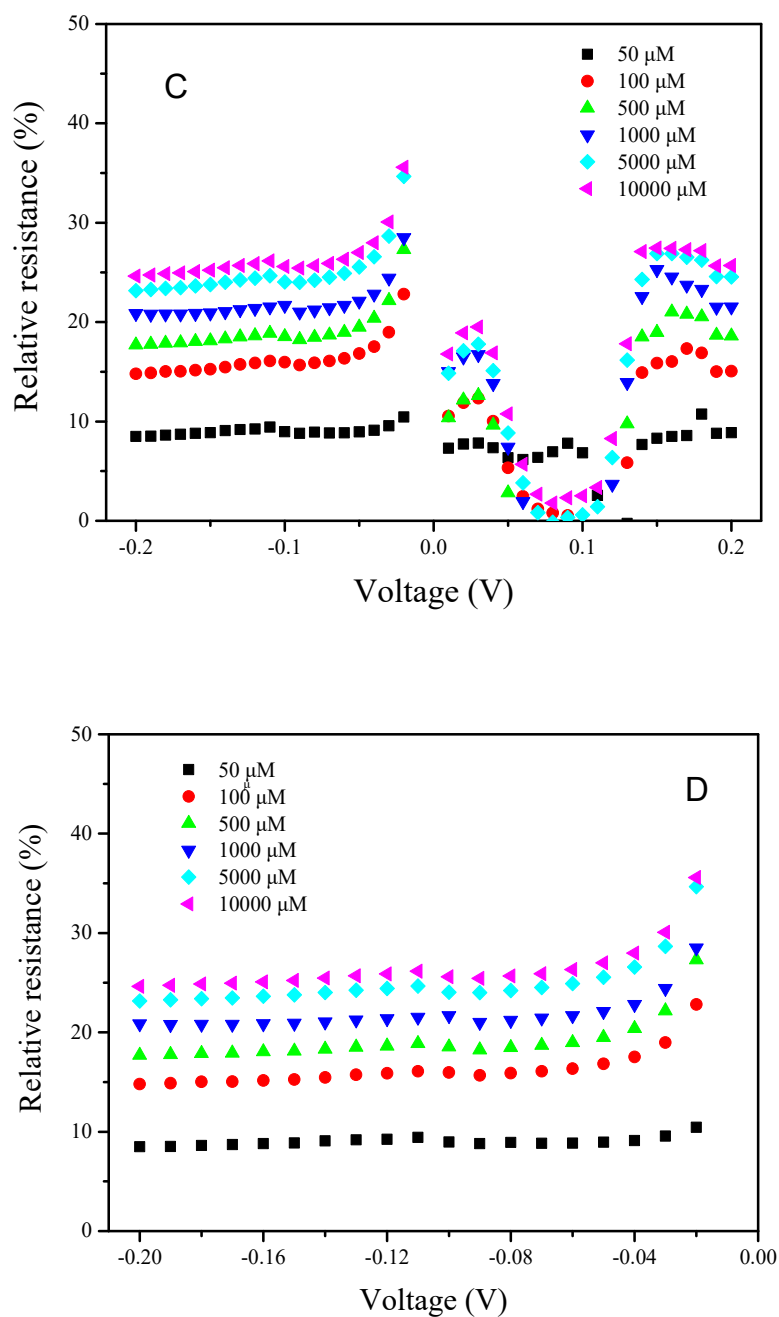

**Figure S6.** (A)The current-voltage of SPFET/SWNTs-PCA/DNAzyme exposure to different  $\text{Ca}^{2+}$  concentrations; (B)The resistances at each voltages after SPFET/SWNTs-PCA/DNAzyme exposure to different  $\text{Ca}^{2+}$  concentrations; (C)The relative resistances

ranging from -0.2 V to 0.2 V after SPFET/SWNTs-PCA/DNAzyme exposure to different  $\text{Ca}^{2+}$  concentrations. (D) Relative resistances of SPFET/sSWNT-PCA/DNAzyme ranging from -0.2 V to 0 V.

The cleavage efficiency of DNAzyme is associated with  $\text{Ca}^{2+}$  concentration and incubation time. Three different  $\text{Ca}^{2+}$  concentrations (100, 1000, and 10000  $\mu\text{M}$ ) were measured by SPFET/SWNTs-PCA/DNAzyme with varying incubation times in the range from 0 to 11 min. As shown in Figure S10, the relative resistance of SPFET/SWNTs-PCA/DNAzyme was proportional to  $\text{Ca}^{2+}$  concentrations and incubation time. For the same  $\text{Ca}^{2+}$  concentration, the relative resistance increased with incubation time, but the growth rate decreased significantly when the incubation time was higher than 7 min. For this reason, 7 min was chosen as the optimal incubation time for the experiment.

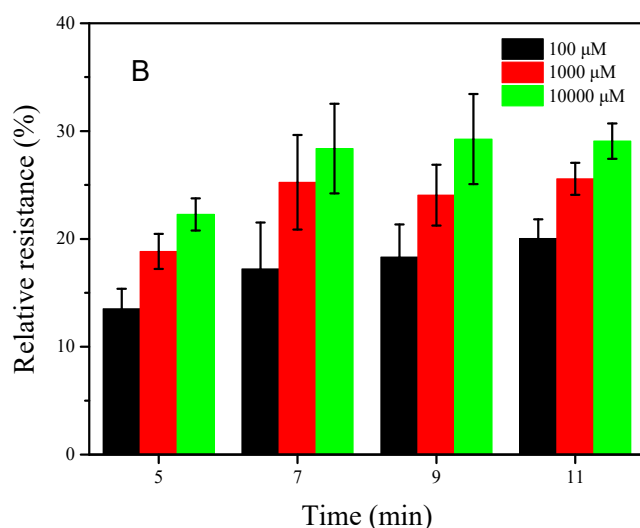

**Figure S7.** Relative resistances of SPFET/SWNTs-PCA/DNAzyme changing with the

incubation time in the range from 0 to 11 min for three different  $\text{Ca}^{2+}$  concentrations.

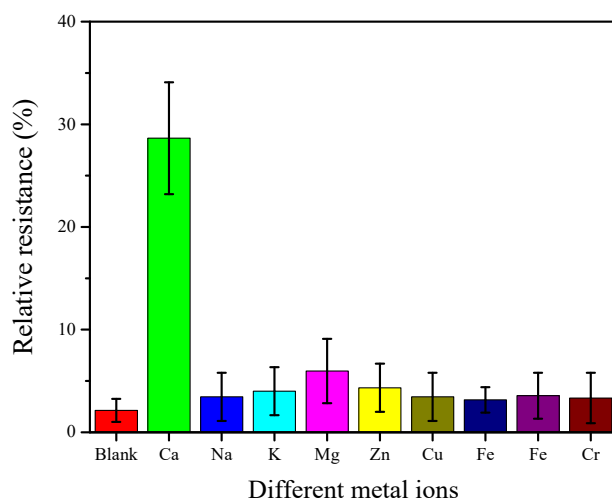

**Figure S8.** Relative resistances of SPFET/SWNT/DNAzyme before and after incubation in 10 mM solutions of different metal ions including  $\text{Na}^+$ ,  $\text{K}^+$ ,  $\text{Mg}^{2+}$ ,  $\text{Zn}^{2+}$ ,  $\text{Cu}^{2+}$ ,  $\text{Fe}^{2+}$ ,  $\text{Fe}^{3+}$ , and  $\text{Cr}^{3+}$ .

For SPFET/SWNTs-PCA/DNAzyme, the regression equations were  $y_1 = 22.132x + 39.265$  and  $y_2 = 5.4265x + 23.577$  with the R-squared of 0.9939 and 0.9782, respectively, which the detection limit was  $10.7 \mu\text{M}$  ( $N/S=3$ ). For SPFET/SWNTs-PCA/Nonzyme, the relative resistance revealed excellent relationship with the logarithm of  $\text{Ca}^{2+}$  concentration in the range of 0.025 mM to 10 mM. The linear regression equation was  $y = 2.3384x + 4.5091$  with the linear regression correlation coefficient of 0.987.



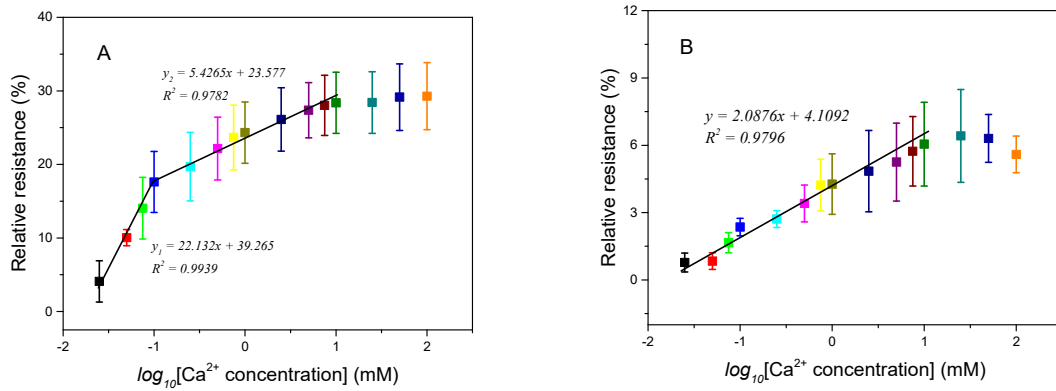

**Figure S9.** The linear relationship between the relative resistances of SPFET/SWNTs-PCA/DNAzyme(A) and SPFET/SWNTs-PCA/Nonzyme(B) and the logarithm of the  $\text{Ca}^{2+}$  concentration.

**Table S2.** Comparison of the performances of Dual-BioFET and other reported sensors for  $\text{Ca}^{2+}$  determination.

| Sensor                               | Method       | pH       | Time (min) | Linear range ( $\mu\text{M}$ )            | LOD ( $\mu\text{M}$ ) | Ref.      |
|--------------------------------------|--------------|----------|------------|-------------------------------------------|-----------------------|-----------|
| Ca-ISE                               | Potential    | 2.0      | 1.67       | $3.1 \times 10^{-3} \sim 3.2 \times 10^4$ | -                     | 1         |
| $\text{Ca}^{2+}$ -SCISE              | Potential    | -        | 1.0        | $1.0 \times 10^{-1} \sim 1.0 \times 10^4$ | 5.00                  | 2         |
| ECL-based ion-selective nano-optodes | Potential    | 7.4      | -          | $1.0 \times 10^0 \sim 5.0 \times 10^2$    | 0.11                  | 3         |
| $\text{Fe}_2\text{O}_3$ -ZnO NRs/FET | Curent       | 7.6      | -          | $1.0 \times 10^1 \sim 3.0 \times 10^3$    | 0.05                  | 4         |
| $\text{Co}_3\text{O}_4$ CNT          | Curent       | -        | 0.84       | $1.0 \times 10^2 \sim 1.1 \times 10^4$    | 3.80                  | 5         |
| IS-OECT                              | Curent       | -        | 20         | $1.0 \times 10^1 \sim 1.0 \times 10^4$    |                       | 6         |
| CD-EGTA                              | Fluorescent  | 7        | 240        | $1.5 \times 10^1 \sim 3.0 \times 10^2$    | 0.38                  | 7         |
| DLLME                                | UV-visiable  | 12.8     | 30         | $1.5 \times 10^0 \sim 3.7 \times 10^1$    | 0.43                  | 8         |
| SD-ISO                               | Fluorescence | 6.0-8.0  | 5          | $1.0 \times 10^1 \sim 1.0 \times 10^6$    | 9.30                  | 9         |
| SA-4CO <sub>2</sub> Et               | Fluorescence | 4.0-10.0 | 240        | $6.0 \times 10^2 \sim 3.0 \times 10^3$    | -                     | 10        |
| DNAzyme/SWNT/FET                     | Curent       | 6.9      | 9          | $1.0 \times 10^1 \sim 1.0 \times 10^3$    | 7.20                  | 11        |
| Dual BioFET                          | Curent       | 7.4      | 7          | $2.5 \times 10^1 \sim 5.0 \times 10^3$    | 10.70                 | This work |

CD-EGTA: carbon dot-ethylenebis(oxyethylenenitrilo)tetraacetic acid; ISO: ion-selective optode; SD: solvatochromic

dye; ISE: potentiometry based on a calcium-selective electrode; SCISE: solid-contact calcium-selective electrode; IS-OECT: ion-selective organic electrochemical transistor; SA: salicyladazine; ECL: electrochemiluminescence;

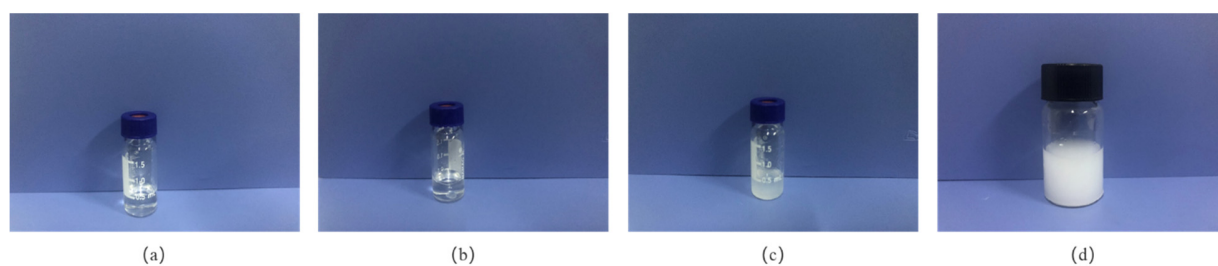

**Figure S10.** Preparation of superhydrophobic solution: (a) pure OTS; (b) OTS added with water; (c) mixing by vortex and sonication; and (d) incubation for 2 h under ambient conditions and dilution with hexane.

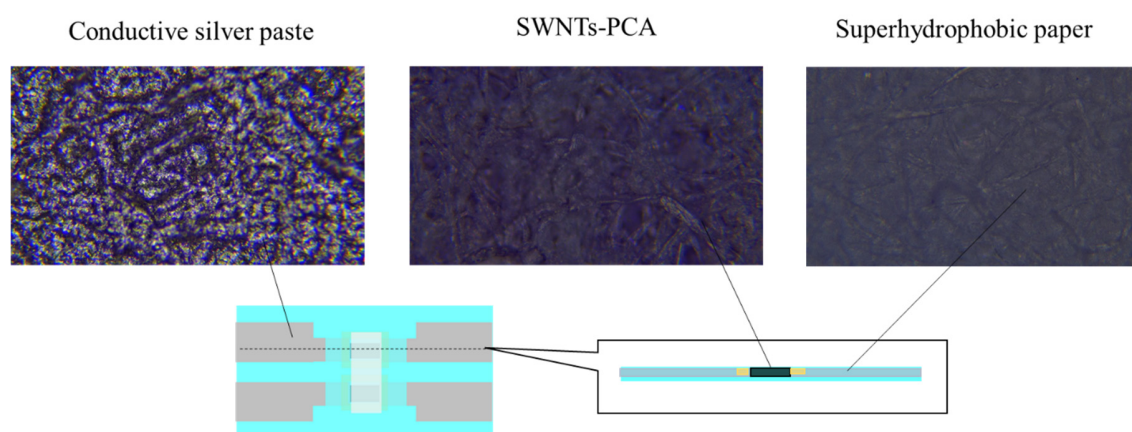

**Figure S11.** Structural diagram and microscope photographs of SPFET/SWNTs-PCA.

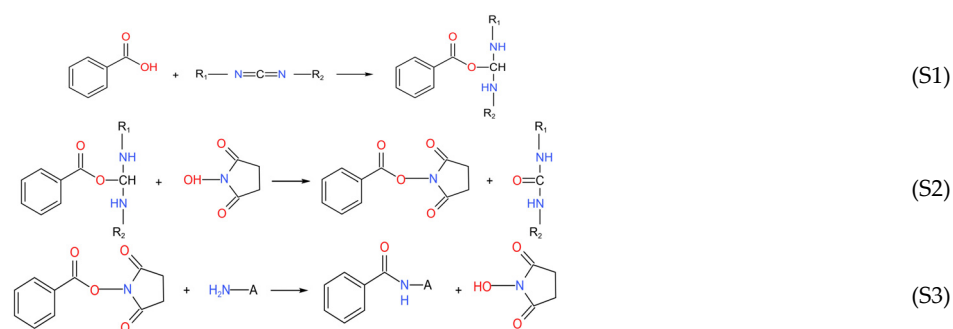

## References

1. Liu, S.; Ding, J.; Qin, W. Current pulse based ion-selective electrodes for chronopotentiometric determination of calcium in seawater. *Anal. Chim. Acta* **2018**, *1031*, 67–74, <https://doi.org/10.1016/j.aca.2018.06.018>.
2. Ocaña, C.; Abramova, N.; Bratov, A.; Lindfors, T.; Bobacka, J.J.T. Calcium-selective electrodes based on photo-cured polyurethane-acrylate membranes covalently attached to methacrylate functionalized poly (3, 4-ethylenedioxythiophene) as solid-contact. *Talanta* **2018**, *186*, 279–285.
3. Zhang, J.; Chen, Y.; Fang, D. Electrochemiluminescence in Luminol-based calcium-selective nanoparticles for the determination of calcium ions. *J. Electroanal. Chem.* **2020**, *878*, 114671, <https://doi.org/10.1016/j.jelechem.2020.114671>.
4. Ahmad, R.; Tripathy, N.; Ahn, M.-S.; Yoo, J.-Y.; Hahn, Y.-B. Preparation of a Highly Conductive Seed Layer for Calcium Sensor Fabrication with Enhanced Sensing Performance. *ACS Sens.* **2018**, *3*, 772–778, <https://doi.org/10.1021/acssensors.7b00900>.
5. Yuan, H.; Ma, C.; Geng, J.; Zhang, L.; Cui, H.; Liu, C. Preparation of Co<sub>3</sub>O<sub>4</sub> conical nanotube and its application in calcium ion biosensor. *Appl. Phys. A* **2018**, *124*, 101, <https://doi.org/10.1007/s00339-017-1460-x>.
6. Keene, S.; Fogarty, D.; Cooke, R.; Casadevall, C.D.; Salleo, A.; Parlak, O. Wearable Organic Electrochemical Transistor Patch for Multiplexed Sensing of Calcium and Ammonium Ions from Human Perspiration. *Adv. Heal. Mater.* **2019**, *8*, e1901321, <https://doi.org/10.1002/adhm.201901321>.
7. Yue, J.; Li, L.; Cao, L.; Zan, M.; Yang, D.; Wang, Z.; Chang, Z.; Mei, Q.; Miao, P.; Dong, W.-F. Two-Step Hydrothermal Preparation of Carbon Dots for Calcium Ion Detection. *ACS Appl. Mater. Interfaces* **2019**, *11*, 44566–44572, <https://doi.org/10.1021/acsami.9b13737>.
8. Peng, B.; Zhou, J.; Xu, J.; Fan, M.; Ma, Y.; Zhou, M.; Li, T.; Zhao, S. A smartphone-based colorimetry after dispersive liquid–liquid microextraction for rapid quantification of calcium in water and food samples. *Microchem. J.* **2019**, *149*, <https://doi.org/10.1016/j.microc.2019.104072>.
9. Shibata, H.; Ikeda, Y.; Hiruta, Y.; Citterio, D. Inkjet-printed pH-independent paper-based calcium sensor with fluorescence signal readout relying on a solvatochromic dye. *Anal. Bioanal. Chem.* **2020**, *412*, 3489–3497.
10. Gao, M.; Li, Y.; Chen, X.; Li, S.; Ren, L.; Tang, B.Z. Aggregation-Induced Emission Probe for Light-Up and in Situ Detection of Calcium Ions at High Concentration. *ACS Appl. Mater. Interfaces* **2018**, *10*, 14410–14417, <https://doi.org/10.1021/acsami.8b00952>.
11. Wang, H.; Luo, Q.; Zhao, Y.; Nan, X.; Zhang, F.; Wang, Y.; Wang, Y.; Hua, D.; Zheng, S.; Jiang, L.; et al. Electrochemical device based on nonspecific DNAzyme for the high-accuracy determination of Ca<sup>2+</sup> with Pb<sup>2+</sup> interference. *Bioelectrochemistry* **2020**, *140*, 107732, <https://doi.org/10.1016/j.bioelechem.2020.107732>.
